# Supplementary material for: Giant nonlinear optical activity in two-dimensional palladium diselenide
Source: PubMed Central journal article supplement (PMC7889859; doi:10.1038/s41467-021-21267-4), 2021-02-17
Supplement: 41467_2021_21267_MOESM1_ESM.pdf [file 41467_2021_21267_MOESM1_ESM.pdf]

# Supplementary Information

## Giant Nonlinear Optical Activity in Two-Dimensional Palladium Diselenide

Juan Yu<sup>1,2,3,#</sup>, Xiaofei Kuang<sup>3,#</sup>, Junzi Li<sup>4,#</sup>, Jiahong Zhong<sup>1,2</sup>, Cheng Zeng<sup>1,2</sup>, Lingkai Cao<sup>1,2</sup>, Zongwen Liu<sup>5</sup>, Zhouxiaosong Zeng<sup>6</sup>, Ziyu Luo<sup>6</sup>, Tingchao He<sup>4,\*</sup>, Anlian Pan<sup>6,\*</sup>, & Yanping Liu<sup>1,2,7\*</sup>

1. *School of Physics and Electronics, Hunan Key Laboratory for Super-microstructure and Ultrafast Process, Central South University, 932 South Lushan Road, Changsha, Hunan 410083, P. R. China*
2. *State Key Laboratory of High-Performance Complex Manufacturing, Central South University, 932 South Lushan Road, Changsha, Hunan 410083, P. R. China*
3. *School of Electronics and Information, Hangzhou Dianzi University, 1158 Second Street, Xiasha College Park, Hangzhou, Zhejiang, 310018, P. R. China*
4. *College of Physics and Optoelectronic Engineering, Shenzhen University, Shenzhen 518060, P. R. China*
5. *School of Chemical and Biomolecular Engineering, The University of Sydney, NSW 2006, Australia*
6. *College of Materials Science and Engineering, Hunan University, Changsha, Hunan 410082, P. R. China*
7. *Shenzhen Research Institute of Central South University, A510a, High-tech Industrial Park, Yuehai Street, Shenzhen 518057, P. R. China*

---

\* Correspondence and requests for materials should be addressed to Email:  
[tche@szu.edu.cn](mailto:tche@szu.edu.cn); [anlian.pan@hnu.edu.cn](mailto:anlian.pan@hnu.edu.cn); [liuyanping@csu.edu.cn](mailto:liuyanping@csu.edu.cn)

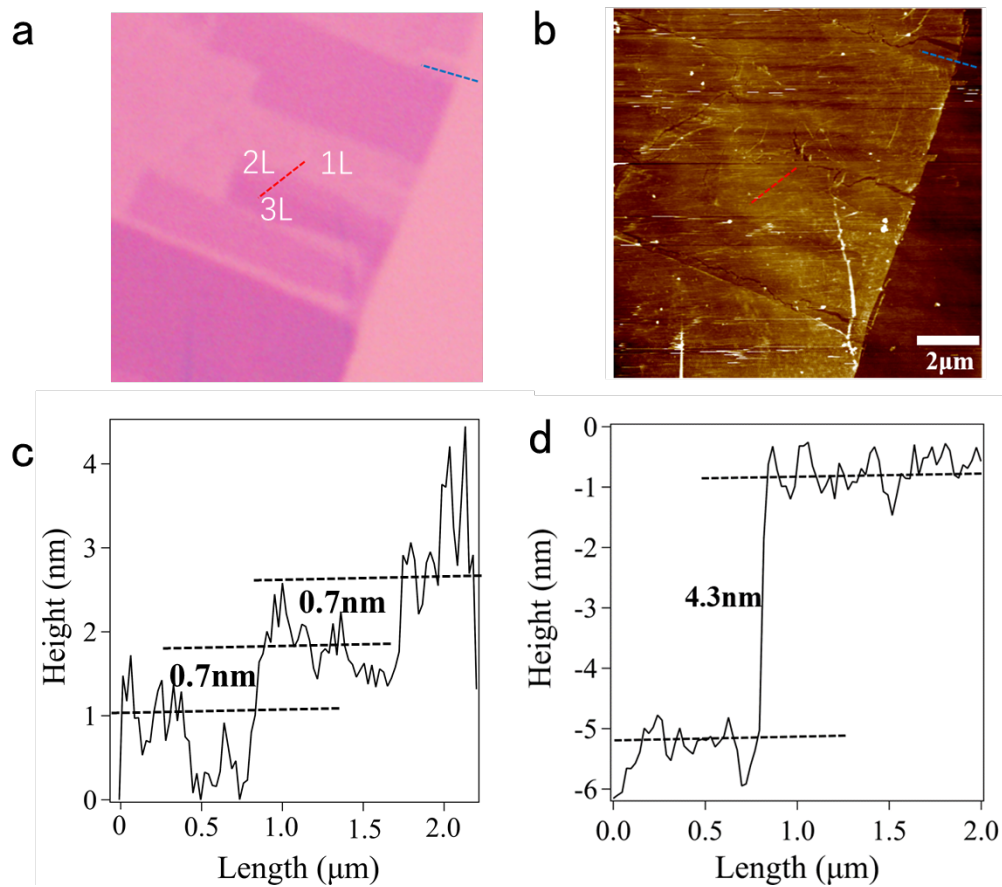

**Figure S1. Atomic force microscopic (AFM) investigation of few-layer PdSe<sub>2</sub> flakes.** (a) Optical microscope image of the few-layer PdSe<sub>2</sub> on the silicon substrate with a 285 nm SiO<sub>2</sub> layer. The number of sample layers containing 1-3 L was marked with white letters, and the scale bar is 2 μm. (b) The atomic force microscopic (AFM) images of the PdSe<sub>2</sub> corresponding to the region in (a). (c) The line profile scanned from the red line in the image (a) and (b) including 2 L and 3 L. The height difference between 1 L and 2 L is 0.7 nm. Meanwhile, the height difference between 2 L and 3 L is also 0.7 nm. (d) The line profile scanned from the blue line of monolayer PdSe<sub>2</sub> in the image (a) and (b). It shows 4.3 nm and not 0.7 nm, but the Raman spectrum indicates the monolayer, which confirms the difficulty to ascertain the very thin thickness of flakes from AFM.

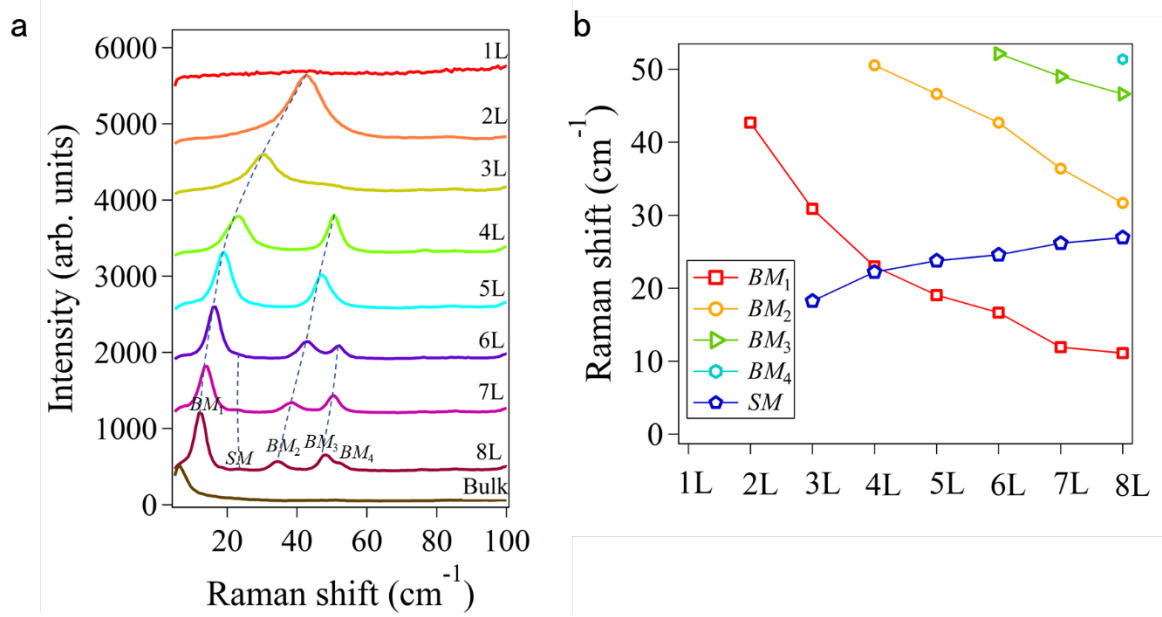

**Figure S2: The low-frequency Raman shift of few-layer PdSe<sub>2</sub>.** (a) Raman spectra of 1-8 L and bulk PdSe<sub>2</sub>.  $BM_1$ ,  $BM_2$ ,  $BM_3$ , and  $BM_4$  are the first, second, third, and fourth branches of the breathing mode, respectively.  $SM$  is the shear mode of PdSe<sub>2</sub>. The corresponding layer numbers are labeled on the right side of the panel. (b) Raman shift of  $BM_1$ ,  $BM_2$ ,  $BM_3$ ,  $BM_4$  and  $SM$  modes versus layer numbers. According to our experimental observations, the peak positions of the breathing and shear modes in different layers have a certain relationship with the layer numbers, as shown in (b). Therefore, the number of layers can be determined according to the peak positions of different modes. It can be seen that the peak position of  $BM_1$ , the first branch of breathing modes, changes more obviously with the number of layers (2L  $\sim$  42.689 cm<sup>-1</sup>, 3L  $\sim$  30.8739 cm<sup>-1</sup>, 4L  $\sim$  22.9888 cm<sup>-1</sup>, 5L  $\sim$  19.0438 cm<sup>-1</sup>, 6L  $\sim$  16.6479 cm<sup>-1</sup>, and 7L  $\sim$  11.9246 cm<sup>-1</sup>).

**Note S1:**

The second-order susceptibility  $\chi^{(2)}$  of 4 L PdSe<sub>2</sub> is calculated by the following formula<sup>1</sup>:

$$I_{2\omega} = [\chi^{(2)}]^2 I_{\omega}^2 8\epsilon_0 c^3 \cdot \frac{1}{n_{2\omega} n_{\omega}^2} \cdot \frac{\omega^2 t^2}{8\epsilon_0 c^3} \quad (\text{S1})$$

Where  $\epsilon_0$  is the vacuum dielectric constant,  $c$  is the vacuum light speed,  $n_{2\omega}$  and  $n_{\omega}$  are the refractive indexes of PdSe<sub>2</sub> at the SHG signal wavelength and the excitation wavelength<sup>2,3</sup>.  $\omega$  is the frequency of the excitation light.  $t$  is the thickness of the sample.  $I_{2\omega}$  and  $I_{\omega}$  are the optical intensity of the SHG signal and incident light, which can be obtained by the following equations:

$$I_{2\omega} = \frac{2P_{2\omega}}{\epsilon_0 c \pi R_{2\omega}^2} \quad (\text{S2})$$

$$I_{\omega} = \frac{2P_{\omega}}{\epsilon_0 c \pi R_{\omega}^2} \quad (\text{S3})$$

Where  $P_{2\omega}$  and  $P_{\omega}$  are the power of the SHG signal and the incident light, respectively. And  $R_{2\omega}$  and  $R_{\omega}$  are the radius of the SHG signal and the excitation light. The second-order susceptibility  $\chi^{(2)}$  of 4 L PdSe<sub>2</sub> is  $5.17 \times 10^{-11} \text{ m V}^{-1}$ .

**Table S1.** Comparison of second-order nonlinear susceptibility in different 2D materials.

| Material             | $\chi^{(2)}$ m V <sup>-1</sup> | Excitation wavelength | Thickness | Ref.      |
|----------------------|--------------------------------|-----------------------|-----------|-----------|
| $\epsilon$ -InSe     | $1.3 \times 10^{-11}$          | 800 nm                | ~20 nm    | 1         |
| WS <sub>2</sub>      | $2.0 \times 10^{-12}$          | 800 nm                | 1L        |           |
| $\epsilon$ -GaSe     | $1.1 \times 10^{-11}$          | 800 nm                | ~20 nm    |           |
| 2H-MoTe <sub>2</sub> | $2.5 \times 10^{-9}$           | 1550 nm               | 1L        | 4         |
| graphene             | $9.0 \times 10^{-11}$          | 1300 nm               | 3L        | 5         |
| ReS <sub>2</sub>     | $9.0 \times 10^{-10}$          | 1558 nm               | 2L        | 6         |
| PdSe <sub>2</sub>    | $5.17 \times 10^{-11}$         | 880 nm                | 1L        | This work |

**Table S1** represents the second-order nonlinear susceptibility ( $\chi^{(2)}$ ) of several two-dimensional materials (including InSe, WS<sub>2</sub>, GaSe, MoTe<sub>2</sub>, MoSe<sub>2</sub>, graphene, and ReS<sub>2</sub>) and PdSe<sub>2</sub> (our work) under different laser excitation wavelength and sample thickness. The corresponding references are on the far right of the table.

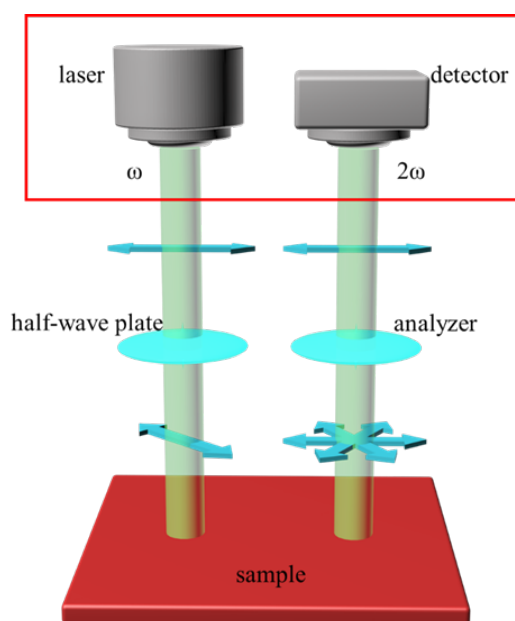

**Figure S3. Schematic experimental configuration of the polarization-resolved SHG measurement in PdSe<sub>2</sub>.** The polarization direction of the incident light is regulated by the half-wave plate. And the polarization direction of the scattering light is determined by the analyzer. The microscopic imaging system to target the exact flakes is shown in the red box in the figure. The polarization-resolved SHG measurements were performed by our home-built micro-area nonlinear optical characterization system. The spot sizes of the fs pulses on the sample were  $\sim 6 \mu\text{m}$  at 880 nm, and the pump laser was supplied by Spectra-Physics Solstice Maitai HP ( $\sim 80$  fs pulses with 80 MHz repetition rate). During the measurement, the broadband ultrafast variable attenuators (Newport VA-BB) were employed to control the incident energy of the laser pulses. An analyzer was used to optimize with polarization to obtain the maximum the SHG signal. The SHG signals are collected by a  $50\times$  objective lens (NA = 0.55), and then detected by a spectrometer (SpectraPro HRS-300).

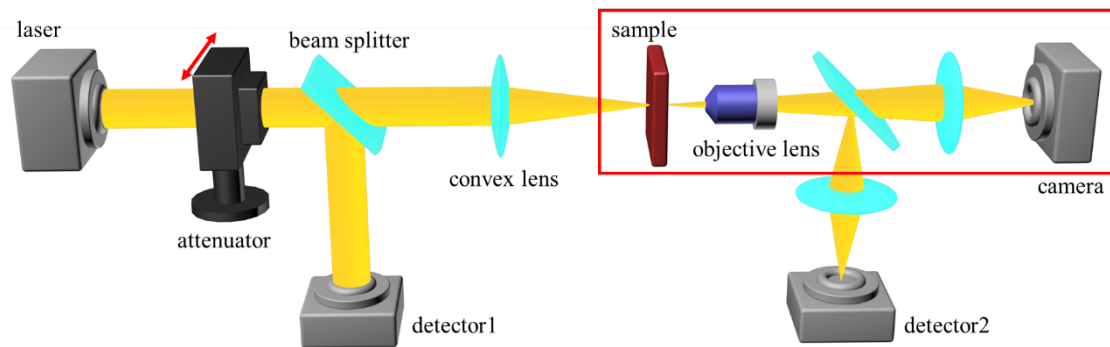

**Figure S4. Schematic experimental setting of the I-scan measurement in PdSe<sub>2</sub>, which is used for the TPA and SA measurement.** The microscopic imaging system to target the exact flakes is shown in the red box in the figure. The TPA and SA coefficients of PdSe<sub>2</sub> were determined by our home-built micro-area nonlinear optical characterization system. The spot sizes of the fs pulses on the PdSe<sub>2</sub> were  $\sim 4 \mu\text{m}$  at 600 nm and  $\sim 6 \mu\text{m}$  at 800 nm, respectively. During the measurements, the broadband ultrafast variable attenuators (Newport VA-BB) were employed to control the incident energy of the laser pulses. The video microscope system (Olympus BX43) was constructed by the confocal microscope and the imaging development camera. The transmitted light passing through the PdSe<sub>2</sub> was first collected by a 50 $\times$  objective lens with NA = 0.55 (working distance  $\sim 1$  mm and focal length  $\sim 3.5$  mm) and was then detected by a silicon detector.

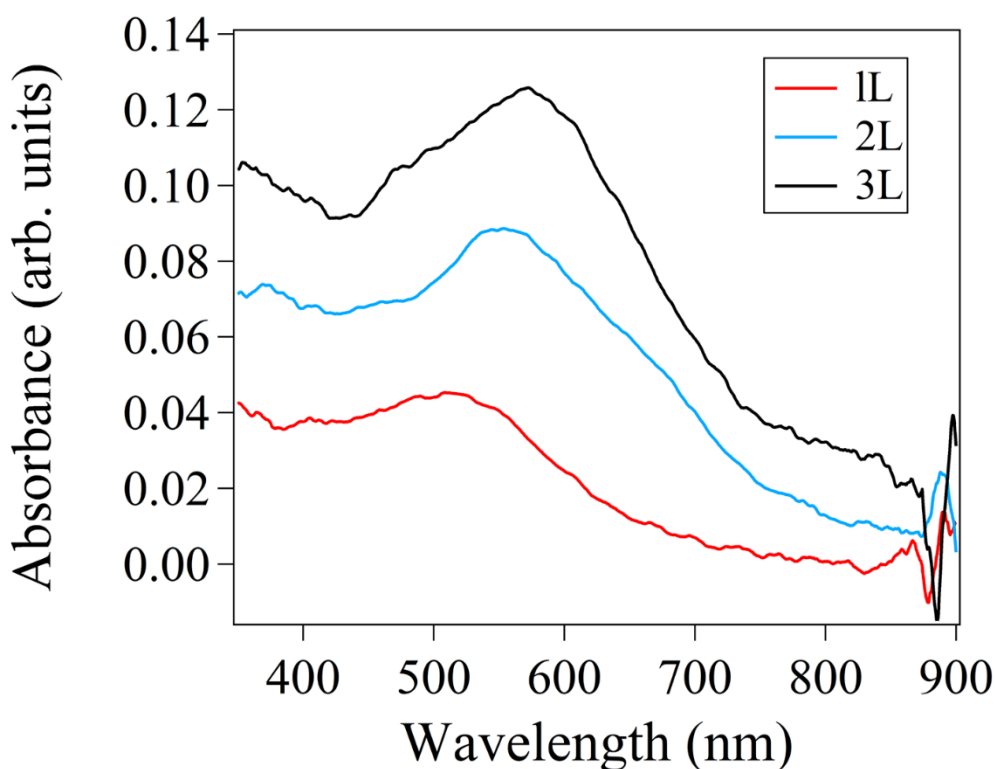

**Figure S5. Linear absorption spectra of 1-3 L PdSe<sub>2</sub> flakes.** A Jasco MSV 5200 microspectrophotometer was used to acquire high-resolution absorption spectra, which contains a microscopic system that can accurately define the sample area. The minimum measurement field size is 10  $\mu\text{m}$ , and the magnification of the objective lens is  $\times 32$ . The PMT detector was used for the visible region, and the NIR DET was utilized for the near-infrared region. The measured spectral range was 300–1000 nm. The data interval was 0.5 nm. The scanning speed was set to 1000 nm min<sup>-1</sup>. Our samples of 1, 2, and 3 L PdSe<sub>2</sub> are beyond 40  $\mu\text{m}$ . The linear absorption coefficient of 1, 2, and 3 L PdSe<sub>2</sub> at 800 nm are  $3.9 \times 10^3$ ,  $1.3 \times 10^4$ ,  $1.9 \times 10^4$  cm<sup>-1</sup>, respectively, according to the formula:  $I = I_0 e^{-\mu t}$ , where  $I_0$  and  $I$  are the intensity of the incident and detecting light,  $\mu$  is the linear absorption coefficient, and  $t$  is the thickness of the sample. The small linear absorption coefficient implies that TPA dominates the optical process under the large incident irradiance at 800 nm.



**Table S2.** Comparison of TPA coefficients in different 2D materials.

| 2D material       | TPA coefficient (cm GW <sup>-1</sup> ) | laser              | thickness      | Ref       |
|-------------------|----------------------------------------|--------------------|----------------|-----------|
| MoS <sub>2</sub>  | 4223 ± 62                              | 1030nm,350fs,100Hz | 1.5 ± 0.75 nm  | 7         |
|                   | 1065 ± 62                              |                    | 5.5 ± 0.75 nm  |           |
|                   | 485 ± 11                               |                    | 18.7 ± 0.70 nm |           |
|                   | 499 ± 2                                |                    | 50.0 ± 0.75 nm |           |
| MoSe <sub>2</sub> | 6906 ± 39                              | 1030nm,350fs,100Hz | 0.65 ± 0.65 nm | 7         |
|                   | 4287 ± 58                              |                    | 1.4 ± 0.70 nm  |           |
|                   | 2755 ± 133                             |                    | 5.8 ± 0.64 nm  |           |
| WS <sub>2</sub>   | 4085 ± 67                              | 1030nm,350fs,100Hz | 1.20 ± 0.65 nm | 7         |
|                   | 765 ± 44                               |                    | 7.5 ± 0.75 nm  |           |
|                   | 788 ± 18                               |                    | 14.0 ± 0.70 nm |           |
|                   | 857 ± 20                               |                    | 30.0 ± 0.75 nm |           |
| WSe <sub>2</sub>  | 7102 ± 45                              | 1030nm,350fs,100Hz | 0.8 ± 0.65 nm  | 7         |
|                   | 3021 ± 47                              |                    | 1.6 ± 0.75 nm  |           |
|                   | 2359 ± 201                             |                    | 5.6 ± 0.80 nm  |           |
| MoS <sub>2</sub>  | 14200                                  | 1030nm,340fs,1kHz  | 1L             | 8         |
| WS <sub>2</sub>   | 6300                                   |                    | 1L             |           |
| WS <sub>2</sub>   | 10000 ± 8000                           | 1030nm,340fs,1kHz  | 1-3L           | 9         |
|                   | 525 ± 205                              | 800nm,40fs,1kHz    | 1-3L           |           |
| MoS <sub>2</sub>  | 66 ± 4                                 | 1030nm,340fs,1kHz  | 25-27L         |           |
|                   | 11.4 ± 4.3                             | 800nm,40fs,1kHz    | 25-27L         |           |
| MoS <sub>2</sub>  | 7500                                   | 532nm,10ns,1kHz    | 1L             | 10        |
| MoS <sub>2</sub>  | 70                                     | 800nm,100fs,1kHz   | 1L             | 11        |
| MoS <sub>2</sub>  | 7620 ± 150                             | 1030nm,340fs,1kHz  | 1L             | 12        |
| MoS <sub>2</sub>  | 1880 ± 210                             | 1030nm,340fs,1kHz  | 0.7 nm         | 13        |
| PdSe <sub>2</sub> | 416000                                 | 800nm,110fs,1kHz   | 0.7 nm         | This work |
|                   | 258000                                 |                    | 1.4 nm         |           |
|                   | 151000                                 |                    | 2.1 nm         |           |
|                   | 18000                                  |                    | 10.5 nm        |           |

**Table S2** represents the TPA coefficients of several conventional two-dimensional

materials (including MoS<sub>2</sub>, MoSe<sub>2</sub>, WS<sub>2</sub>, and WSe<sub>2</sub>) and PdSe<sub>2</sub> (our work) under different laser excitation and sample thickness. The corresponding references are on the far right of the table.

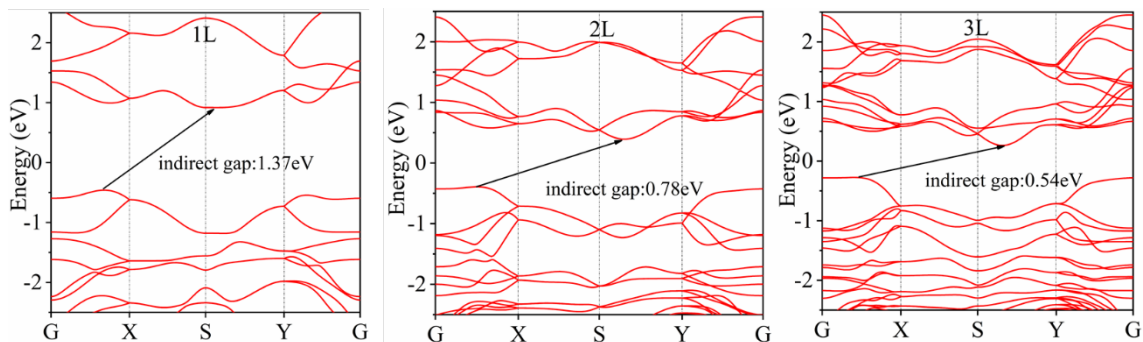

**Figure S6. The theoretical bandgap of PdSe<sub>2</sub>.** Electronic band structure of 1 L (left panel), 2 L (middle panel), and 3 L (right panel) PdSe<sub>2</sub> calculated by DFT method. The minimum of the conduction band and the maximum of the valence band in each layer are indicated by the blue arrows. And the corresponding bandgaps of 1, 2 and 3 L PdSe<sub>2</sub> are 1.37, 0.78 and 0.54 eV, respectively. Theoretical calculation results exhibit that the indirect bandgap of PdSe<sub>2</sub> decreases with the increasing number of layers, from 1.37 eV of the monolayer to 0.03 eV of the bulk.

## Reference:

- 1 Hao, Q., Yi, H., Su, H., Wei, B., Wang, Z., Lao, Z., Chai, Y., Wang, Z., Jin, C., Dai, J. & Zhang, W. Phase Identification and Strong Second Harmonic Generation in Pure  $\epsilon$ -InSe and Its Alloys. *Nano Letters* **19**, 2634-2640 (2019).
- 2 Zhang, G., Amani, M., Chaturvedi, A., Tan, C., Bullock, J., Song, X., Kim, H., Lien, D.-H., Scott, M. C., Zhang, H. & Javey, A. Optical and electrical properties of two-dimensional palladium diselenide. *Applied Physics Letters* **114**, 253102 (2019).
- 3 Huanian, Z., Pengfei, M., Mingxiao, Z., Wenfei, Z., Guomei, W. & Shenggui, F. Palladium selenide as a broadband saturable absorber for ultrafast photonics. *Nanophotonics* **9**, 2557-2567 (2020).
- 4 Song, Y., Tian, R., Yang, J., Yin, R., Zhao, J. & Gan, X. Second Harmonic Generation in Atomically Thin MoTe<sub>2</sub>. *Advanced Optical Materials* **6**, 1701334 (2018).
- 5 Shan, Y., Li, Y., Huang, D., Tong, Q., Yao, W., Liu, W.-T. & Wu, S. Stacking symmetry governed second harmonic generation in graphene trilayers. *Science Advances* **4**, eaat0074 (2018).
- 6 Song, Y., Hu, S., Lin, M.-L., Gan, X., Tan, P.-H. & Zhao, J. Extraordinary Second Harmonic Generation in ReS<sub>2</sub> Atomic Crystals. *ACS Photonics* **5**, 3485-3491 (2018).
- 7 Dong, N., Li, Y., Zhang, S., McEvoy, N., Gatensby, R., Duesberg, G. S. & Wang, J. Saturation of Two-Photon Absorption in Layered Transition Metal Dichalcogenides: Experiment and Theory. *ACS Photonics* **5**, 1558-1565 (2018).
- 8 Dai, X., Zhang, X., Kislyakov, I. M., Wang, L., Huang, J., Zhang, S., Dong, N. & Wang, J. Enhanced two-photon absorption and two-photon luminescence in monolayer MoS<sub>2</sub> and WS<sub>2</sub> by defect repairing. *Opt. Express* **27**, 13744-13753 (2019).
- 9 Zhang, S., Dong, N., McEvoy, N., O'Brien, M., Winters, S., Berner, N. C., Yim, C., Li, Y., Zhang, X., Chen, Z., Zhang, L., Duesberg, G. S. & Wang, J. Direct Observation of Degenerate Two-Photon Absorption and Its Saturation in WS<sub>2</sub> and MoS<sub>2</sub> Monolayer and Few-Layer Films. *ACS Nano* **9**, 7142-7150 (2015).
- 10 Zhang, J., Ouyang, H., Zheng, X., You, J., Chen, R., Zhou, T., Sui, Y., Liu, Y., Cheng, X. a. & Jiang, T. Ultrafast saturable absorption of MoS<sub>2</sub> nanosheets under different pulse-width excitation conditions. *Opt. Lett.* **43**, 243-246 (2018).
- 11 Zhou, F. & Ji, W. Two-photon absorption and subband photodetection in monolayer MoS<sub>2</sub>. *Opt. Lett.* **42**, 3113-3116 (2017).
- 12 Li, Y., Dong, N., Zhang, S., Zhang, X., Feng, Y., Wang, K., Zhang, L. & Wang, J. Giant two-photon absorption in monolayer MoS<sub>2</sub>. *Laser & Photonics Reviews* **9**, 427-434 (2015).
- 13 Xie, Y., Zhang, S., Li, Y., Dong, N., Zhang, X., Wang, L., Liu, W., Kislyakov, I. M., Nunzi, J.-M., Qi, H., Zhang, L. & Wang, J. Layer-modulated two-photon absorption in MoS<sub>2</sub>: probing the shift of the excitonic dark state and band-edge. *Photon. Res.* **7**, 762-770 (2019).
